# Supplementary material for: A Co(ii)–Ru(ii) dyad relevant to light-driven water oxidation catalysis
Source: Royal Society of Chemistry journal article supplement (doi:10.1039/c3cp55369h), 2014-01-01
Supplement: c3cp55369h1.pdf [file c3cp55369h1.pdf]

## **A Co(II)-Ru(II) dyad relevant to light-driven water oxidation catalysis.**

**Alejandro Montellano López,<sup>a‡</sup> Mirco Natali,<sup>b‡</sup> Erica Pizzolato,<sup>a</sup> Claudio Chiorboli,<sup>c</sup> Marcella Bonchio,<sup>a</sup> Andrea Sartorel<sup>\*a</sup> and Franco Scandola<sup>\*b</sup>**

<sup>a</sup>*ITM-CNR* and Department of Chemical Sciences, University of Padova, via Marzolo 1, 35131 Padova, Italy Fax: +39 049 8275300; Tel: +39 049 8275252; E-mail: andrea.sartorel@unipd.it.

<sup>b</sup>Department of Chemical and Pharmaceutical Sciences, University of Ferrara, and Centro Interuniversitario per la Conversione Chimica dell'Energia Solare (sez. Ferrara), via Fossato di Mortara 17-27, 44121 Ferrara, Italy Fax: +39 0532 240709; Tel: +39 0532 455160; E-mail: snf@unife.it.

<sup>c</sup>ISOF-CNR c/o Department of Chemical and Pharmaceutical Sciences, University of Ferrara, Via Luigi Borsari 46, 44121 Ferrara, Italy.

<sup>‡</sup>These authors contributed equally to the paper.

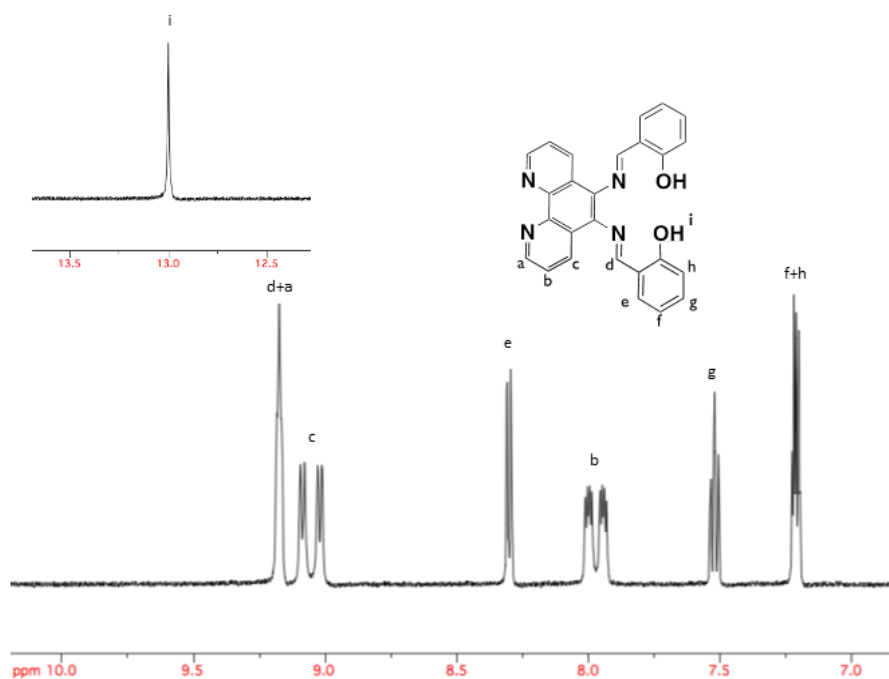

**Figure S1.** <sup>1</sup>H-NMR (500 MHz) spectra of (2) d<sup>6</sup>-DMSO.

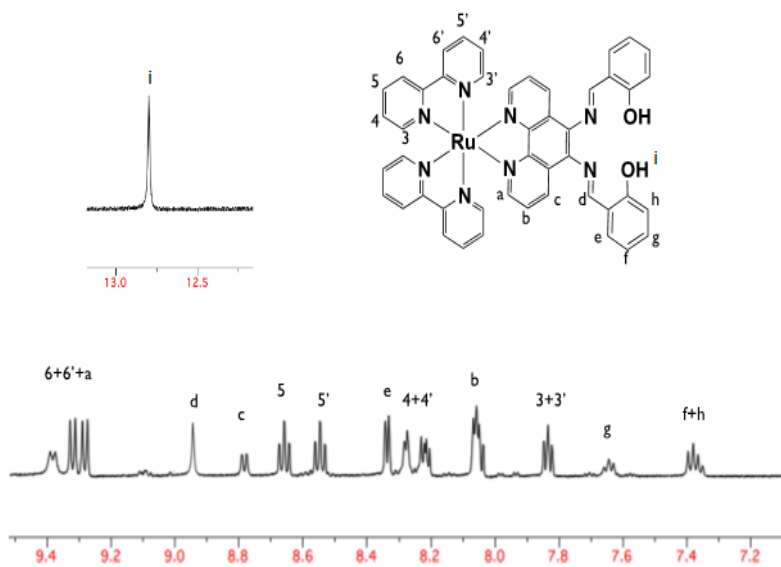

**Figure S2.** <sup>1</sup>H-NMR (500 MHz) spectra of (3) d<sup>6</sup>-DMSO.

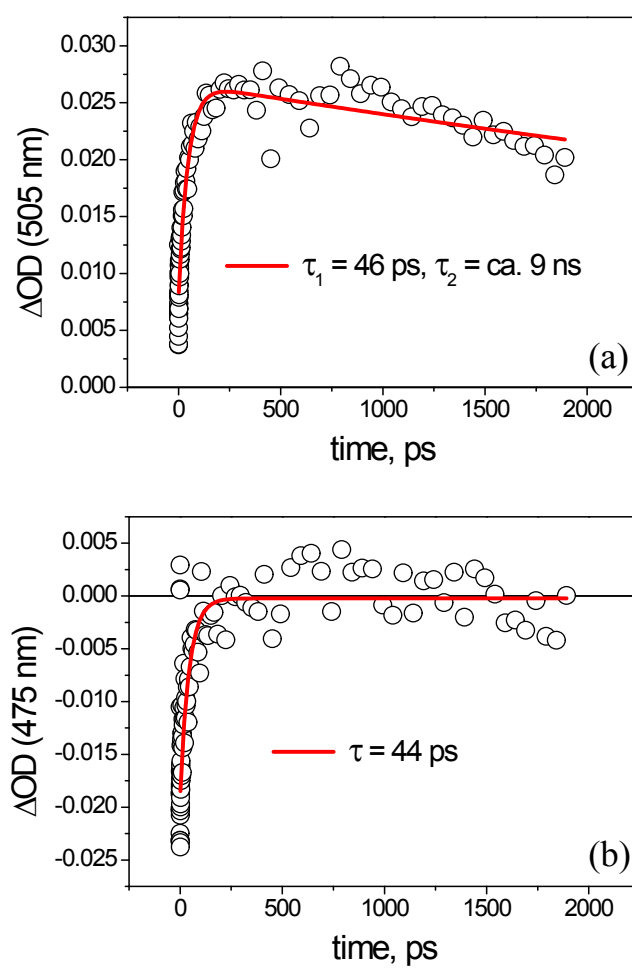

**Figure S3.** Kinetic analysis obtained by UFS (excitation at 400 nm) on **3** (a) at 505 nm and (b) at 475 nm.

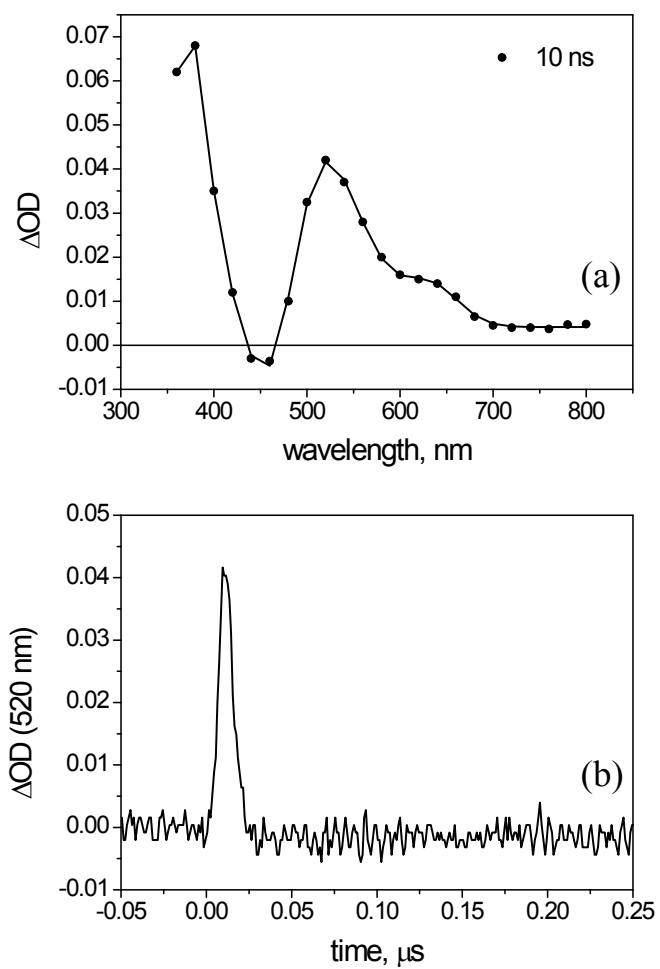

**Figure S4.** (a) Transient spectrum of **3** in acetonitrile at 10 ns time-delay obtained by laser flash photolysis (excitation at 355 nm); (b) kinetic profile of the transient recorded at 520 nm.

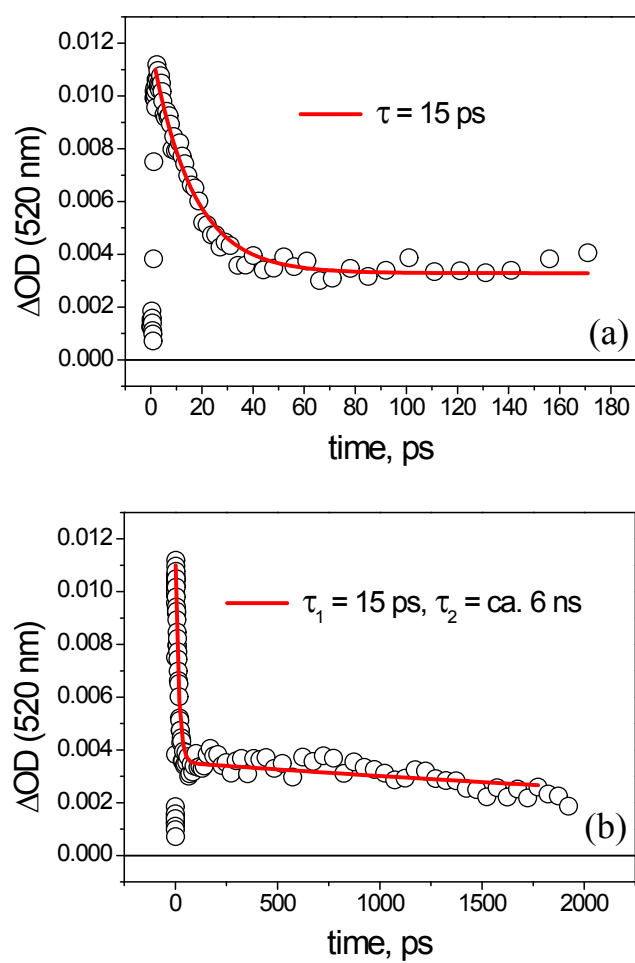

**Figure S5.** Kinetic analysis obtained by UFS (400-nm excitation) on **1** in acetonitrile at 520 nm: (a) 0-200 ps and (b) 0-2000 ps.

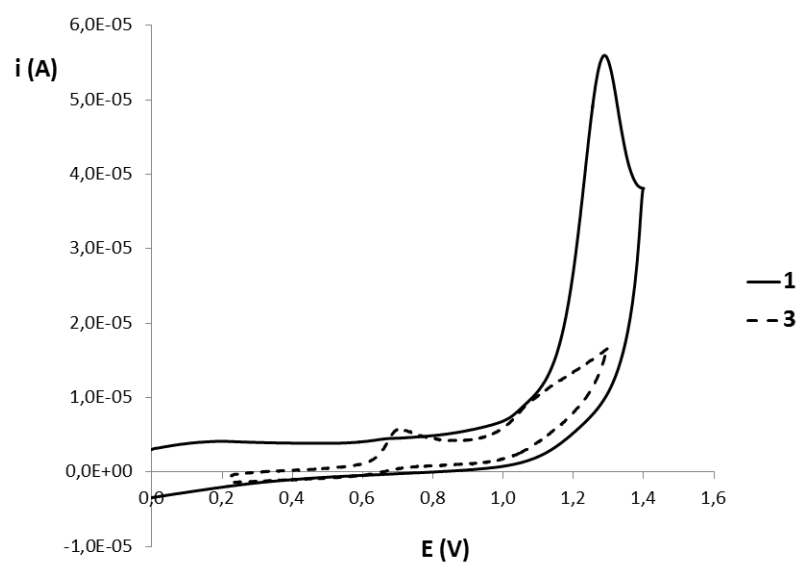

**Figure S6.** Cyclic voltammograms of 0.5 mM **1** and **3** under anodic scans in 0.2 M phosphate buffer, pH 7. Working electrode glassy carbon, counter electrode: platinum wire, reference electrode: Ag/AgCl (3 M NaCl); scan rate  $20 \text{ mVs}^{-1}$ .

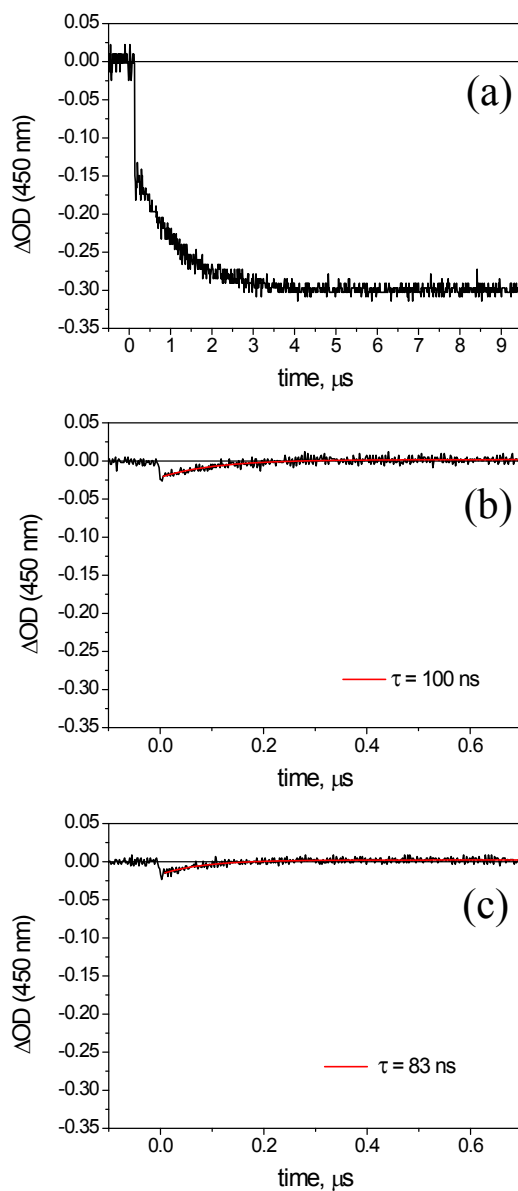

**Figure S7.** Kinetic analysis at 450 nm obtained by laser flash photolysis (355-nm excitation) in pH 7 phosphate buffer solutions (optically matched at the excitation wavelength) containing (a)  $Ru(bpy)_3^{2+}$  and 5 mM  $Na_2S_2O_8$ , (b) **3** and 5 mM  $Na_2S_2O_8$ , and (c) **1** and 5 mM  $Na_2S_2O_8$ . The efficiency of the bimolecular excited-state quenching by persulfate, as determined by emission measurements, is comparable ( $\geq 90\%$ ) in the three cases.
